# Supplementary material for: Jahn–Teller distortions of six-coordinate CuII compounds: cis or trans?
Source: Royal Society of Chemistry journal article supplement (doi:10.1039/b903867a), 2009-01-01
Supplement: b903867a.pdf [file b903867a.pdf]

| Refcode        | S(OC) | S(TPR) | $\alpha$ | $\Delta$ | $d_1$ | $d_2$ |
|----------------|-------|--------|----------|----------|-------|-------|
| GITAE          | 13.68 | 0.92   | 67       | 0.79     | 2.828 | 2.331 |
| Lyonsite       | 17.57 | 1.18   | 61       | 0.94     | 2.575 | 2.575 |
| HENQIA         | 12.43 | 2.24   | 68       | 0.81     | 2.321 | 2.250 |
| Buttgenbachite | 19.01 | 2.94   | 58       | 0.95     | 2.910 | 2.910 |
| DUYJEM         | 6.97  | 3.59   | 77       | 0.34     | 2.266 | 2.254 |
| BOTHOH         | 5.75  | 3.73   | 76       | 0.22     | 2.205 | 2.197 |
| VIFKAW         | 5.34  | 3.85   | 78       | 0.19     | 2.263 | 2.263 |
| RINKII         | 5.31  | 3.87   | 82       | 0.12     | 2.184 | 2.135 |
| NELHAN         | 5.67  | 3.93   | 76       | 0.26     | 2.347 | 2.295 |
| ACADIS-Cu1     | 5.70  | 4.28   | 73       | 0.24     | 2.239 | 2.211 |
| AWENEV         | 4.88  | 4.83   | 73       | 0.31     | 2.320 | 2.205 |
| JEXZOC         | 4.45  | 5.08   | 76       | 0.22     | 2.259 | 2.139 |
| BAFMOK         | 20.51 | 5.93   | 67       | 0.65     | 2.645 | 2.645 |
| ETUFAA-Cu1     | 4.09  | 6.46   | 73       | 0.27     | 2.293 | 2.150 |
| NEENCU         | 19.23 | 7.34   | 82       | 0.51     | 2.509 | 2.509 |
| LOTSOC         | 2.40  | 8.27   | 78       | 0.19     | 2.218 | 2.211 |
| ETAMCU         | 2.42  | 9.26   | 84       | 0.26     | 2.265 | 2.235 |
| AHICOJ         | 2.87  | 9.44   | 70       | 0.32     | 2.286 | 2.209 |
| AHICID         | 2.49  | 10.16  | 71       | 0.31     | 2.291 | 2.236 |
| HIGSUM         | 1.70  | 10.31  | 79       | 0.23     | 2.247 | 2.197 |
| XAGWAE         | 1.65  | 11.63  | 89       | 0.10     | 2.179 | 2.175 |
| UFAPOH         | 1.37  | 11.74  | 81       | 0.10     | 2.172 | 2.169 |
| FUPJIJ-Cu1     | 1.33  | 12.31  | 97       | 0.15     | 2.200 | 2.165 |
| CEYLAU         | 0.77  | 14.20  | 105      | 0.20     | 2.182 | 2.182 |
| KOJTOS01       | 0.60  | 15.18  | 81       | 0.42     | 2.403 | 2.243 |

**Table S1.** Shape and geometrical parameters for *cis*-distorted Cu(II) complexes with N- or O-donor ligands. S(OC) and S(TPR) are the octahedral and trigonal prismatic shape measures, respectively,  $\alpha$  is the L-M-L bond angle between the two longest M-L bonds,  $d_1$  and  $d_2$  are the two longest M-L distances and  $\Delta$  is the difference between the longest and shortest M-L bond distances. All distances in Å, angles in degrees.

| Refcode    | S(OC) | S(TPR) | $\alpha$ | $\Delta$ |
|------------|-------|--------|----------|----------|
| PURZIL     | 12.83 | 0.92   | 131      | 0.232    |
| ACADIS-Cu2 | 5.78  | 3.95   | 152      | 0.119    |
| ZALFUN     | 4.97  | 4.11   | 152      | 0.210    |
| ZOVFIZ     | 6.43  | 4.99   | 137      | 0.444    |
| KELZOQ     | 5.63  | 5.36   | 160      | 0.475    |
| CALCEY     | 5.39  | 5.41   | 151      | 0.507    |
| SECBAE     | 4.15  | 7.18   | 149      | 0.438    |
| ETUFAA-Cu2 | 3.48  | 7.18   | 153      | 0.273    |
| ECEZUH     | 4.35  | 7.33   | 148      | 0.599    |
| PIWTAQ     | 4.20  | 7.42   | 160      | 0.418    |
| MEMYUY     | 2.91  | 7.87   | 151      | 0.370    |
| EBOGOS01   | 3.32  | 8.07   | 154      | 0.533    |
| EBOGOS     | 3.37  | 8.14   | 154      | 0.547    |
| RIJTOT     | 3.38  | 8.18   | 153      | 0.513    |
| LERZUE     | 3.33  | 8.71   | 155      | 0.336    |
| AXOKON-Cu3 | 3.17  | 8.97   | 161      | 0.279    |
| QEZKEM     | 2.18  | 9.65   | 156      | 0.394    |
| KOSYUM     | 2.45  | 10.16  | 154      | 0.444    |
| PIKZOZ     | 2.37  | 10.23  | 162      | 0.454    |
| GAZVEI     | 1.67  | 10.71  | 176      | 0.269    |
| ZIZPUT     | 1.85  | 10.81  | 161      | 0.442    |
| EXIWEN     | 1.33  | 10.94  | 166      | 0.275    |
| KCUEDA10   | 2.06  | 10.99  | 173      | 0.451    |
| DIVZIR     | 1.49  | 11.02  | 179      | 0.290    |
| SIHMUR     | 1.50  | 11.18  | 168      | 0.373    |
| WUTXAK-Cu3 | 1.550 | 11.24  | 169      | 0.213    |
| LUHNUX-Cu2 | 1.600 | 11.30  | 163      | 0.336    |
| XUTYOA     | 1.61  | 11.32  | 166      | 0.269    |
| CMGEDT01   | 1.60  | 11.51  | 176      | 0.306    |
| IROMAD     | 1.65  | 11.70  | 156      | 0.385    |
| BIWCOZ01   | 1.15  | 11.78  | 164      | 0.196    |
| EBUYIJ     | 1.64  | 11.79  | 166      | 0.431    |
| YENTAN-Cu2 | 1.40  | 11.90  | 169      | 0.152    |
| AJOGAH     | 1.56  | 12.20  | 162      | 0.364    |
| YENTAN-Cu1 | 1.36  | 12.23  | 169      | 0.176    |
| GUMPEJ     | 1.41  | 12.44  | 172      | 0.404    |
| ROSHOW     | 1.34  | 12.68  | 169      | 0.379    |
| LIZVIZ     | 1.23  | 12.71  | 166      | 0.382    |
| MUSREX     | 1.34  | 12.82  | 169      | 0.283    |
| HEFZIC     | 1.22  | 12.85  | 172      | 0.107    |
| QELRAB     | 1.38  | 12.87  | 172      | 0.310    |
| REZJAI     | 1.32  | 12.99  | 170      | 0.137    |

|            |      |       |     |       |
|------------|------|-------|-----|-------|
| LUHNUX-Cu1 | 1.22 | 13.22 | 169 | 0.380 |
| QILFEW     | 1.07 | 13.50 | 171 | 0.311 |
| KEQRAZ     | 1.04 | 13.58 | 171 | 0.298 |
| NEGRUN     | 0.88 | 13.58 | 172 | 0.097 |
| FECQEK-Cu3 | 0.40 | 13.59 | 169 | 0.139 |
| PUSGEP     | 0.98 | 13.60 | 165 | 0.330 |
| CEYLUO-Cu1 | 0.90 | 13.69 | 154 | 0.772 |
| UDOBOE     | 1.00 | 13.73 | 176 | 0.369 |
| HEWQUW     | 0.43 | 13.81 | 175 | 0.076 |
| YUDNAM     | 1.05 | 13.89 | 175 | 0.334 |
| TUXZUH     | 0.64 | 14.19 | 172 | 0.244 |
| FACPCU     | 0.69 | 14.71 | 167 | 0.307 |
| PUSGEP-Cu1 | 0.49 | 14.81 | 175 | 0.267 |
| NAFACU10   | 0.30 | 15.12 | 175 | 0.222 |
| CDSRCA10   | 0.72 | 15.14 | 172 | 0.367 |
| MEGPEU     | 0.53 | 15.26 | 175 | 0.309 |
| ISIPIJ-Cu2 | 0.37 | 15.33 | 174 | 0.247 |
| HOKJIA     | 0.26 | 15.37 | 180 | 0.178 |
| KIXKIL     | 0.56 | 15.57 | 176 | 0.302 |
| TFAPCU01   | 0.59 | 15.64 | 173 | 0.328 |
| CUETNM10   | 0.43 | 15.68 | 175 | 0.396 |
| JURXEZ     | 0.37 | 15.83 | 177 | 0.296 |
| DUBTAV     | 0.21 | 15.88 | 177 | 0.254 |
| TFAPCU     | 0.55 | 15.93 | 173 | 0.324 |
| RECCOS     | 0.49 | 15.97 | 180 | 0.226 |
| GIKCEJ     | 0.51 | 16.01 | 180 | 0.159 |
| GIKSUO01   | 0.45 | 16.05 | 180 | 0.290 |
| RELCUG04   | 0.37 | 16.07 | 180 | 0.190 |
| CAMSCU     | 0.41 | 16.07 | 179 | 0.257 |
| KUKFOL     | 0.46 | 16.08 | 180 | 0.236 |
| YAGDIU     | 0.09 | 16.15 | 180 | 0.086 |
| TAFACU-Cu1 | 0.06 | 16.18 | 178 | 0.089 |
| PEVDAW     | 0.20 | 16.19 | 180 | 0.116 |
| VENNUY     | 0.05 | 16.21 | 180 | 0.022 |
| HOKJEW     | 0.49 | 16.23 | 180 | 0.319 |
| FOFKAN     | 0.11 | 16.24 | 180 | 0.115 |
| MIGGIT     | 0.38 | 16.26 | 180 | 0.228 |
| PIJSIL     | 0.40 | 16.26 | 180 | 0.291 |
| ZODHUV     | 0.23 | 16.34 | 180 | 0.189 |
| MINZAK     | 0.19 | 16.38 | 180 | 0.192 |
| PANNIC     | 0.42 | 16.39 | 180 | 0.296 |
| BEEXAJ     | 0.10 | 16.41 | 180 | 0.119 |
| PABREQ     | 0.06 | 16.45 | 180 | 0.093 |

|            |      |       |     |       |
|------------|------|-------|-----|-------|
| RIDMUN     | 0.21 | 16.48 | 180 | 0.197 |
| DAZKOF     | 0.44 | 16.48 | 180 | 0.269 |
| TAFACU-Cu2 | 0.44 | 16.48 | 178 | 0.300 |
| AVUJEG02   | 0.07 | 16.51 | 180 | 0.141 |
| QESXER     | 0.32 | 16.57 | 180 | 0.238 |
| HOYZEA     | 0.24 | 16.57 | 180 | 0.232 |
| REFGAL     | 0.32 | 16.58 | 180 | 0.230 |
| ZUBKOW01   | 0.10 | 16.59 | 180 | 0.150 |
| VUDRER05   | 0.24 | 16.60 | 180 | 0.222 |
| ZUBKOW-Cu2 | 0.05 | 16.63 | 180 | 0.108 |
| YIGMOQ     | 0.29 | 16.66 | 180 | 0.238 |
| FAHHOL     | 0.17 | 16.66 | 180 | 0.199 |
| HOYZIE-Cu1 | 0.15 | 16.71 | 180 | 0.193 |
| VUDRER04   | 0.35 | 16.71 | 180 | 0.272 |

**Table S2.** Shape and geometrical parameters for *trans*-distorted Cu(II) complexes with N- or O-donor ligands. S(OC) and S(TPR) are the octahedral and trigonal prismatic shape measures, respectively,  $\alpha$  is the L-M-L bond angle between the two longest M-L bonds (in degrees), and  $\Delta$  is the difference between the longest and shortest M-L bond distances (Å).

**Table S3.** Atomic coordinates of the optimized structure of [Cu(1)]<sup>2+</sup>.

---

|    |           |           |           |
|----|-----------|-----------|-----------|
| 61 |           |           |           |
| C  | -2.843747 | -0.427418 | -0.215283 |
| C  | -2.064645 | -1.625850 | -0.791293 |
| C  | -2.706893 | -2.831913 | -1.068117 |
| C  | -1.961175 | -3.893541 | -1.574453 |
| C  | -0.600861 | -3.731452 | -1.812499 |
| C  | -0.001054 | -2.508892 | -1.511145 |
| C  | 1.417158  | -2.189401 | -1.775672 |
| C  | 2.288160  | -3.051458 | -2.444856 |
| C  | 3.584395  | -2.632617 | -2.732458 |
| C  | 3.980827  | -1.350010 | -2.361845 |
| C  | 3.073343  | -0.540208 | -1.687855 |
| C  | -2.529631 | 0.899548  | -0.934677 |
| C  | -3.520232 | 1.706615  | -1.493468 |
| C  | -3.153610 | 2.936459  | -2.038369 |
| C  | -1.833270 | 3.371266  | -1.954905 |
| C  | -0.891145 | 2.538888  | -1.351095 |
| C  | 0.499919  | 2.917890  | -1.024788 |
| C  | 1.047485  | 4.169827  | -1.304282 |
| C  | 2.318553  | 4.487639  | -0.831842 |
| C  | 3.012330  | 3.552183  | -0.068408 |
| C  | 2.427704  | 2.311868  | 0.162899  |
| C  | -2.474917 | -0.273592 | 1.274656  |
| C  | -3.433267 | -0.197439 | 2.278683  |
| C  | -2.978187 | -0.081188 | 3.592811  |
| C  | -1.612596 | -0.089693 | 3.861433  |
| C  | -0.705405 | -0.191605 | 2.798966  |
| C  | 0.763215  | -0.348004 | 2.973015  |
| C  | 1.356858  | -0.447404 | 4.236859  |
| C  | 2.719482  | -0.709259 | 4.342077  |
| C  | 3.466519  | -0.885231 | 3.179968  |
| C  | 2.819594  | -0.755807 | 1.955383  |
| Cu | 0.321525  | 0.109403  | -0.289493 |
| H  | -4.588039 | -0.824785 | -1.163856 |
| H  | -3.758304 | -2.945538 | -0.863113 |
| H  | -2.438520 | -4.839974 | -1.782303 |
| H  | -0.025086 | -4.546375 | -2.219931 |
| H  | 1.965055  | -4.033602 | -2.750688 |
| H  | 4.265165  | -3.291033 | -3.251680 |
| H  | 4.969390  | -0.980626 | -2.587462 |
| H  | 3.341057  | 0.460626  | -1.391373 |
| H  | -4.554477 | 1.406475  | -1.472957 |
| H  | -3.901770 | 3.569518  | -2.492603 |
| H  | -1.561134 | 4.343553  | -2.333120 |
| H  | 0.489366  | 4.897582  | -1.871699 |
| H  | 2.749153  | 5.455685  | -1.041843 |
| H  | 3.985384  | 3.773197  | 0.342483  |
| H  | 2.923920  | 1.563359  | 0.757529  |
| H  | -4.482640 | -0.237676 | 2.040015  |
| H  | -3.686782 | -0.004493 | 4.404628  |
| H  | -1.273258 | -0.030658 | 4.882734  |
| H  | 0.769156  | -0.338249 | 5.134033  |
| H  | 3.183557  | -0.790912 | 5.314090  |
| H  | 4.520140  | -1.116925 | 3.218272  |
| H  | 3.363177  | -0.890045 | 1.031585  |
| N  | -0.734897 | -1.492590 | -0.981699 |
| N  | 1.820211  | -0.944623 | -1.386927 |
| N  | -1.251140 | 1.310674  | -0.902416 |
| N  | 1.207271  | 1.984806  | -0.315389 |

---

|   |           |           |           |
|---|-----------|-----------|-----------|
| N | -1.156880 | -0.243217 | 1.526602  |
| N | 1.502546  | -0.478499 | 1.836714  |
| O | -4.259744 | -0.688606 | -0.252787 |

---

**Table S4.** Atomic coordinates of the optimized structure of [Cu(2-pyridyl)<sub>2</sub>]<sup>2+</sup>.

63

---

|    |           |           |           |
|----|-----------|-----------|-----------|
| C  | -1.229211 | -2.295357 | -1.865141 |
| C  | -0.096038 | -1.817159 | -2.763218 |
| C  | 1.862733  | -2.289877 | -1.346414 |
| C  | 2.660637  | -1.776352 | -0.153272 |
| C  | 1.322340  | -2.347791 | 1.836836  |
| C  | 0.177151  | -1.946803 | 2.767014  |
| C  | -1.761459 | -2.397196 | 1.327610  |
| C  | -2.555052 | -1.810252 | 0.168254  |
| C  | 1.857568  | -0.351757 | -2.860246 |
| C  | -2.478980 | -0.167654 | -1.651764 |
| C  | -2.585577 | 1.070133  | -0.801169 |
| C  | -3.704000 | 1.897151  | -0.780260 |
| C  | -3.700869 | 3.022901  | 0.043222  |
| C  | -2.581147 | 3.287976  | 0.831573  |
| C  | -1.494107 | 2.426412  | 0.765946  |
| C  | 2.430456  | -0.152794 | 1.675562  |
| C  | 2.498662  | 1.108264  | 0.853494  |
| C  | 3.542213  | 2.024437  | 0.977300  |
| C  | 3.532516  | 3.186235  | 0.210014  |
| C  | 2.476880  | 3.407307  | -0.675770 |
| C  | 1.466272  | 2.462123  | -0.759192 |
| C  | -1.836162 | -0.579573 | 2.974155  |
| Cu | 0.008850  | -0.102551 | -0.202886 |
| N  | -1.685702 | -1.220089 | -0.919297 |
| N  | 1.022430  | -1.214828 | -1.968006 |
| N  | 1.761063  | -1.250337 | 0.922007  |
| N  | -0.978605 | -1.359626 | 2.043823  |
| N  | -1.488512 | 1.338857  | -0.043743 |
| N  | 1.468452  | 1.330014  | -0.005572 |
| H  | -2.256665 | -1.208866 | 3.768422  |
| H  | -1.250319 | 0.212282  | 3.437251  |
| H  | -2.659933 | -0.114818 | 2.437264  |
| H  | -2.463401 | -2.902579 | 2.005084  |
| H  | -1.083643 | -3.167678 | 0.962487  |
| H  | -3.198258 | -2.577869 | -0.271779 |
| H  | -3.206824 | -1.020901 | 0.534754  |
| H  | -2.068477 | -2.636652 | -2.479276 |
| H  | -0.913439 | -3.147305 | -1.266830 |
| H  | 0.262915  | -2.654650 | -3.371384 |
| H  | -0.450086 | -1.062405 | -3.463696 |
| H  | -3.468336 | -0.551520 | -1.912532 |
| H  | -1.970126 | 0.071931  | -2.585339 |
| H  | -4.563959 | 1.662312  | -1.390391 |
| H  | -4.560083 | 3.676977  | 0.074405  |
| H  | -2.550553 | 4.143008  | 1.489322  |
| H  | -0.608655 | 2.591047  | 1.358925  |
| H  | 1.253291  | 0.459904  | -3.259586 |
| H  | 2.686543  | 0.078357  | -2.306945 |
| H  | 2.261041  | -0.930156 | -3.696935 |
| H  | 2.546696  | -2.708589 | -2.092438 |
| H  | 1.209850  | -3.100672 | -1.028166 |
| H  | 3.296588  | -2.579882 | 0.232278  |

|   |           |           |           |
|---|-----------|-----------|-----------|
| H | 3.327885  | -0.976539 | -0.468955 |
| H | 2.164860  | -2.693960 | 2.448286  |
| H | 1.027973  | -3.193728 | 1.217249  |
| H | -0.114936 | -2.830696 | 3.350915  |
| H | 0.520228  | -1.212007 | 3.494273  |
| H | 3.435479  | -0.445400 | 1.998369  |
| H | 1.856973  | 0.051060  | 2.579735  |
| H | 4.352218  | 1.824260  | 1.663357  |
| H | 4.335595  | 3.903738  | 0.295971  |
| H | 2.439117  | 4.291683  | -1.293127 |
| H | 0.630949  | 2.594114  | -1.428960 |

---

**Table S5.** Atomic coordinates of the optimized structure of  $[\text{Cu}(\text{2-carboxylate}_2)]^{2+}$ , isomer A.

55

---

|    |           |           |           |
|----|-----------|-----------|-----------|
| C  | 0.982702  | -2.489627 | -1.309102 |
| C  | -0.982741 | 2.489705  | -1.309029 |
| C  | 0.479645  | -2.869457 | 0.093417  |
| C  | -0.479657 | 2.869470  | 0.093498  |
| C  | -0.825317 | -1.824606 | 1.924065  |
| C  | 0.825328  | 1.824530  | 1.924083  |
| C  | -2.188641 | -1.671514 | 1.215975  |
| C  | 2.188641  | 1.671458  | 1.215976  |
| C  | 2.704780  | -0.757908 | 0.915673  |
| C  | -2.704773 | 0.757850  | 0.915678  |
| C  | 1.611195  | -1.437215 | 1.755663  |
| C  | -1.611187 | 1.437135  | 1.755681  |
| C  | 2.990215  | 0.817954  | -0.984079 |
| C  | -2.990201 | -0.818000 | -0.984085 |
| C  | 4.496503  | 1.085857  | -0.852600 |
| C  | -4.496501 | -1.085852 | -0.852624 |
| Cu | 0.000025  | 0.000037  | -0.369365 |
| H  | 1.142552  | -3.619046 | 0.530261  |
| H  | -1.142554 | 3.619034  | 0.530397  |
| H  | -0.498041 | -3.332341 | -0.037651 |
| H  | 0.498028  | 3.332359  | -0.037563 |
| H  | -0.803609 | -2.802489 | 2.422964  |
| H  | 0.803624  | 2.802394  | 2.423015  |
| H  | -0.721877 | -1.074264 | 2.704137  |
| H  | 0.721890  | 1.074159  | 2.704128  |
| H  | -2.962266 | -1.636038 | 1.996531  |
| H  | 2.962280  | 1.635989  | 1.996518  |
| H  | -2.387158 | -2.570537 | 0.633516  |
| H  | 2.387138  | 2.570483  | 0.633513  |
| H  | 3.013721  | -1.427541 | 0.114241  |
| H  | -3.013701 | 1.427493  | 0.114249  |
| H  | 3.578873  | -0.621054 | 1.569572  |
| H  | -3.578874 | 0.621004  | 1.569569  |
| H  | 1.377292  | -0.825575 | 2.624607  |
| H  | -1.377270 | 0.825462  | 2.624597  |
| H  | 2.801422  | -0.016634 | -1.656683 |
| H  | -2.801361 | 0.016572  | -1.656695 |
| H  | -2.492503 | -1.678540 | -1.432169 |
| H  | 2.492492  | 1.678467  | -1.432188 |
| N  | 0.341667  | -1.681449 | 1.001867  |
| N  | -0.341664 | 1.681408  | 1.001881  |
| N  | -2.276489 | -0.515887 | 0.297604  |
| N  | 2.276490  | 0.515830  | 0.297600  |
| O  | 0.652960  | -1.281018 | -1.700902 |

|   |           |           |           |
|---|-----------|-----------|-----------|
| O | -0.653028 | 1.281104  | -1.700872 |
| O | 1.622720  | -3.328226 | -1.974131 |
| O | -1.622754 | 3.328343  | -1.974014 |
| H | 4.708615  | 1.936231  | -0.200351 |
| H | 5.031623  | 0.216768  | -0.465838 |
| H | 4.911629  | 1.313172  | -1.836078 |
| H | -5.031606 | -0.216729 | -0.465920 |
| H | -4.911617 | -1.313212 | -1.836095 |
| H | -4.708643 | -1.936184 | -0.200327 |
| H | -2.008773 | 2.385459  | 2.137465  |
| H | 2.008786  | -2.385554 | 2.137405  |

---

**Table S6.** Atomic coordinates of the optimized structure of  $[\text{Cu}(\text{2-carboxylate}_2)]^{2+}$ , isomer **B**.

49

---

|    |           |           |           |
|----|-----------|-----------|-----------|
| C  | 1.549764  | -1.520157 | -1.770554 |
| C  | 0.605811  | -2.654556 | -1.357654 |
| C  | -1.610997 | -1.659730 | -1.716467 |
| C  | -2.559248 | -0.614427 | -1.132772 |
| C  | -1.567168 | 1.563172  | -1.733554 |
| C  | -0.620252 | 2.690216  | -1.306027 |
| C  | 1.593907  | 1.701503  | -1.693786 |
| C  | 2.544094  | 0.646798  | -1.131506 |
| C  | -1.217977 | -3.104818 | 0.239616  |
| C  | 2.660338  | -1.221042 | 0.429658  |
| C  | 2.562265  | -0.375749 | 1.708816  |
| C  | -2.648138 | 1.218581  | 0.473957  |
| C  | -2.544360 | 0.338548  | 1.728438  |
| C  | 1.211404  | 3.110765  | 0.290404  |
| Cu | 0.006487  | -0.020128 | 0.510643  |
| N  | 1.838895  | -0.583001 | -0.649821 |
| N  | -0.627935 | -2.143240 | -0.721889 |
| N  | -1.848050 | 0.602668  | -0.632021 |
| N  | 0.617242  | 2.170102  | -0.687538 |
| O  | 1.397372  | 0.215212  | 1.869285  |
| O  | -1.381424 | -0.262674 | 1.864739  |
| H  | 1.596787  | 4.019095  | -0.195955 |
| H  | 0.459229  | 3.392532  | 1.024036  |
| H  | 2.013210  | 2.625751  | 0.839198  |
| H  | 2.193736  | 2.540123  | -2.081265 |
| H  | 1.048775  | 1.291013  | -2.544388 |
| H  | 3.288000  | 0.379513  | -1.892307 |
| H  | 3.090118  | 1.065011  | -0.289246 |
| H  | 2.481542  | -1.953193 | -2.158944 |
| H  | 1.105919  | -0.944910 | -2.583401 |
| H  | 0.388704  | -3.271216 | -2.242889 |
| H  | 1.103615  | -3.309144 | -0.645260 |
| H  | 3.706347  | -1.323707 | 0.130066  |
| H  | 2.268892  | -2.212245 | 0.650669  |
| H  | -0.463482 | -3.399589 | 0.965672  |
| H  | -2.019113 | -2.631688 | 0.799323  |
| H  | -1.602340 | -4.003420 | -0.264592 |
| H  | -2.210330 | -2.493685 | -2.113649 |
| H  | -1.070516 | -1.234508 | -2.562755 |
| H  | -3.304607 | -0.333544 | -1.887431 |
| H  | -3.104337 | -1.046979 | -0.297093 |
| H  | -2.501568 | 2.005072  | -2.106361 |
| H  | -1.129905 | 1.005290  | -2.562130 |



|   |           |           |           |
|---|-----------|-----------|-----------|
| H | -0.410244 | 3.322515  | -2.182249 |
| H | -1.114162 | 3.332136  | -0.579636 |
| H | -3.697055 | 1.342326  | 0.192351  |
| H | -2.240792 | 2.197983  | 0.717267  |
| O | 3.537147  | -0.289525 | 2.478649  |
| O | -3.513378 | 0.234844  | 2.503550  |

---

**Table S7.** Atomic coordinates of the optimized structure of  $[\text{Cu}(\mathbf{4})]^{2+}$ . The vibrational analysis of this structure gave one negative frequency at  $15 \text{ cm}^{-1}$ .

---

53

|    |           |           |           |
|----|-----------|-----------|-----------|
| C  | -3.194149 | -0.219227 | 0.004076  |
| C  | 3.194145  | 0.219225  | 0.004425  |
| C  | -2.811906 | -0.099265 | 1.493731  |
| C  | 2.811716  | 0.098271  | 1.493947  |
| C  | -0.744455 | -0.171508 | 2.923988  |
| C  | 0.744194  | 0.169615  | 2.924103  |
| C  | -2.935501 | 1.070652  | -0.803824 |
| C  | 2.935612  | -1.070106 | -0.804387 |
| C  | -0.997380 | 2.641095  | -1.188989 |
| C  | 0.997509  | -2.640370 | -1.190401 |
| C  | 2.613389  | 1.474742  | -0.674508 |
| C  | -2.613304 | -1.474290 | -0.675618 |
| C  | 0.510989  | 2.634742  | -1.397577 |
| C  | -0.510848 | -2.633929 | -1.399079 |
| Cu | 0.000012  | 0.000116  | -0.233681 |
| H  | -3.525569 | 0.559576  | 1.995651  |
| H  | 3.525293  | -0.560933 | 1.995513  |
| H  | 2.916874  | 1.073012  | 1.974469  |
| H  | -2.917093 | -1.074332 | 1.973588  |
| H  | -1.430280 | 1.403630  | 1.802470  |
| H  | 1.430008  | -1.404780 | 1.801533  |
| H  | -1.201822 | 0.189465  | 3.850299  |
| H  | 1.201565  | -0.191975 | 3.850171  |
| H  | -0.875023 | -1.256419 | 2.913984  |
| H  | 0.874766  | 1.254533  | 2.914814  |
| H  | -3.598136 | 1.090424  | -1.671389 |
| H  | 3.598257  | -1.089196 | -1.671959 |
| H  | -3.200261 | 1.937515  | -0.197556 |
| H  | 3.200455  | -1.937379 | -0.198740 |
| H  | -1.457267 | 0.938843  | -2.245560 |
| H  | 1.457417  | -0.937583 | -2.246098 |
| H  | -1.478974 | 3.294655  | -1.920468 |
| H  | 1.479146  | -3.293575 | -1.922170 |
| H  | -1.241415 | 3.032453  | -0.200416 |
| H  | 1.241485  | -3.032215 | -0.202006 |
| H  | 3.168415  | 2.357945  | -0.349193 |
| H  | -3.168362 | -2.357713 | -0.350950 |
| H  | 2.741073  | 1.404685  | -1.755117 |
| H  | -2.740860 | -1.403531 | -1.756196 |
| H  | -1.062323 | -2.124627 | 0.520668  |
| H  | 1.062261  | 2.124429  | 0.521955  |
| H  | 0.919265  | 3.643840  | -1.308387 |
| H  | -0.919114 | -3.643078 | -1.310426 |
| H  | 0.755540  | 2.272549  | -2.396839 |
| H  | -0.755339 | -2.271238 | -2.398175 |
| N  | -1.410231 | 0.388629  | 1.712626  |
| N  | 1.409992  | -0.389719 | 1.712371  |
| N  | -1.510246 | 1.234965  | -1.270749 |
| N  | 1.510376  | -1.234204 | -1.271439 |

|   |           |           |           |
|---|-----------|-----------|-----------|
| N | -1.146397 | -1.701808 | -0.404440 |
| N | 1.146449  | 1.702104  | -0.403366 |
| H | -4.279745 | -0.358343 | -0.010823 |
| H | 4.279742  | 0.358351  | -0.010239 |

---

**Table S8.** Atomic coordinates of the optimized structure of [Cu(cyclen)Cl<sub>2</sub>].

---

35

|    |           |           |           |
|----|-----------|-----------|-----------|
| Cu | 0.398149  | 0.380828  | -0.185296 |
| Cl | 1.951302  | 0.320859  | -1.972232 |
| N  | -0.801533 | 1.533483  | -1.510672 |
| N  | -0.775986 | -1.358543 | -1.204955 |
| Cl | 1.839917  | -0.259004 | 1.518451  |
| N  | -0.843433 | 1.296773  | 1.291035  |
| N  | -1.128394 | -1.808280 | 1.822730  |
| C  | -1.407077 | 0.632367  | -2.534765 |
| C  | -1.881713 | -0.693200 | -1.926233 |
| C  | -1.127977 | -2.633984 | -0.533035 |
| C  | -1.906062 | -2.466123 | 0.782558  |
| C  | -1.678328 | -0.720051 | 2.603626  |
| C  | -2.030267 | 0.583411  | 1.848990  |
| C  | -1.741780 | 2.385273  | -0.733902 |
| C  | -1.177063 | 2.611478  | 0.672824  |
| H  | -2.285724 | -1.318623 | -2.734908 |
| H  | -2.700689 | -0.519263 | -1.225918 |
| H  | -2.241695 | 1.123146  | -3.045805 |
| H  | -0.628219 | 0.432623  | -3.269155 |
| H  | -1.710859 | -3.283691 | -1.201144 |
| H  | -0.190432 | -3.149156 | -0.317204 |
| H  | -2.221673 | -3.472346 | 1.091508  |
| H  | -2.832729 | -1.911597 | 0.593724  |
| H  | -2.558117 | 1.251563  | 2.543205  |
| H  | -2.716625 | 0.361874  | 1.031735  |
| H  | -2.596773 | -1.042627 | 3.107758  |
| H  | -0.961741 | -0.486740 | 3.394352  |
| H  | -1.893258 | 3.174474  | 1.281889  |
| H  | -0.257370 | 3.195413  | 0.612499  |
| H  | -1.919668 | 3.344521  | -1.228843 |
| H  | -2.701416 | 1.872518  | -0.674763 |
| H  | -0.127674 | -1.766629 | 1.687504  |
| H  | -0.054604 | 2.076959  | -1.938500 |
| H  | -0.131050 | 1.395716  | 2.014558  |
| H  | 0.020461  | -1.493723 | -1.827615 |

---

**Table S9.** Atomic coordinates of the optimized structure of [Cu(cyclen{CH<sub>2</sub>CH<sub>2</sub>NH<sub>2</sub>}<sub>2</sub>)]<sup>2+</sup>.

---

49

|    |           |           |           |
|----|-----------|-----------|-----------|
| Cu | -0.381445 | 0.069115  | 0.148024  |
| N  | 2.615927  | -0.711585 | -1.615379 |
| N  | -0.988343 | 1.544822  | -1.195077 |
| N  | -0.699984 | -1.287455 | -1.429467 |
| N  | 1.591081  | 0.485380  | 0.921079  |
| N  | -1.030391 | 1.410156  | 1.633577  |
| N  | -1.099494 | -1.426247 | 1.405816  |
| C  | -1.411615 | 0.879492  | -2.474034 |

|   |           |           |           |
|---|-----------|-----------|-----------|
| C | -1.791107 | -0.575826 | -2.205478 |
| C | -1.254847 | -2.538227 | -0.776506 |
| C | -2.008277 | -2.221966 | 0.516468  |
| C | -1.714165 | -0.796970 | 2.627789  |
| C | -2.115394 | 0.658654  | 2.361419  |
| C | -2.076777 | 2.277805  | -0.460838 |
| C | -1.568031 | 2.633901  | 0.934213  |
| H | -1.986630 | -1.098220 | -3.146028 |
| H | -2.708552 | -0.620106 | -1.619997 |
| H | -2.252785 | 1.404938  | -2.930442 |
| H | -0.581693 | 0.944096  | -3.174927 |
| H | -1.901329 | -3.073936 | -1.476359 |
| H | -0.414107 | -3.194412 | -0.552373 |
| H | -2.324194 | -3.151100 | 0.996607  |
| H | -2.907156 | -1.635176 | 0.329465  |
| H | -2.363477 | 1.153800  | 3.304748  |
| H | -3.009892 | 0.692196  | 1.739509  |
| H | -2.585901 | -1.362281 | 2.962774  |
| H | -0.979917 | -0.852818 | 3.429613  |
| H | -2.357744 | 3.101933  | 1.526263  |
| H | -0.759953 | 3.360508  | 0.853726  |
| H | -2.377471 | 3.179645  | -0.998697 |
| H | -2.947503 | 1.624779  | -0.408817 |
| H | -0.329641 | -2.026510 | 1.697308  |
| H | -0.228677 | 2.195117  | -1.390336 |
| C | 0.162369  | 1.737384  | 2.497274  |
| C | 0.420400  | -1.665426 | -2.386896 |
| C | 1.452385  | 1.770582  | 1.663895  |
| C | 1.800685  | -1.946643 | -1.779012 |
| H | 2.295781  | -2.671218 | -2.433793 |
| H | 1.709567  | -2.428176 | -0.803681 |
| H | 0.084986  | -2.547887 | -2.939037 |
| H | 0.520550  | -0.863230 | -3.115917 |
| H | 2.299002  | 1.965086  | 2.324663  |
| H | 1.427406  | 2.584174  | 0.938679  |
| H | 0.008205  | 2.688860  | 3.011533  |
| H | 0.251545  | 0.970432  | 3.265365  |
| H | 3.541774  | -0.936637 | -1.254280 |
| H | 1.974780  | -0.242958 | 1.519777  |
| H | 2.744334  | -0.231468 | -2.504434 |
| H | 2.156316  | 0.506021  | 0.064419  |

---
